# Supplementary material for: Responding to ACL Injury and its Treatments: Comparative Gene Expression between Articular Cartilage and Synovium
Source: MDPI journal article supplement (doi:10.3390/bioengineering10050527), 2023-04-26
Supplement: s1 [file s1]

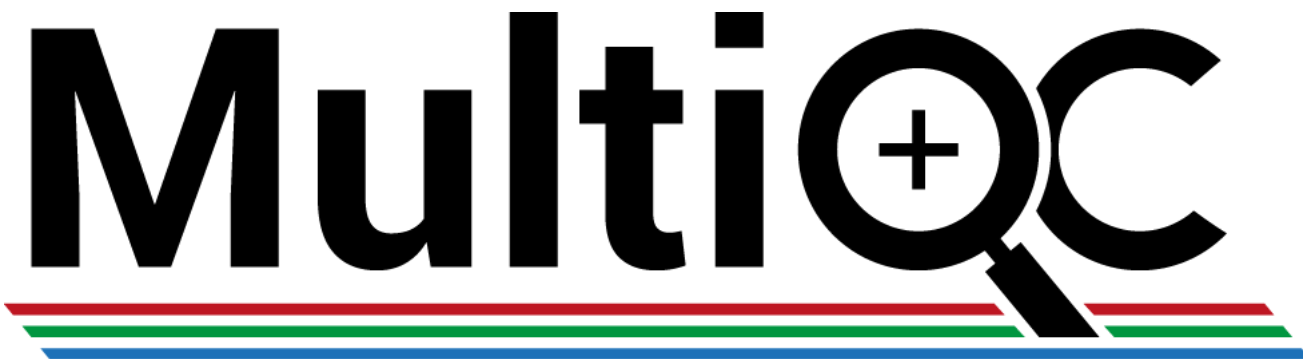

(<http://multiqc.info>)

A modular tool to aggregate results from bioinformatics analyses across many samples into a single report.

Report generated on 2022-08-15, 21:53 based on data in:

- /n/scratch3/users/j/jid4/Articular\_Cartilage\_long\_term/fastqc\_results/LIB053209\_TRA00222266\_S49\_R1\_001\_fastqc.html
- /n/scratch3/users/j/jid4/Articular\_Cartilage\_long\_term/fastqc\_results/LIB053209\_TRA00222266\_S49\_R1\_001\_fastqc.zip
- /n/scratch3/users/j/jid4/Articular\_Cartilage\_long\_term/fastqc\_results/LIB053209\_TRA00222266\_S49\_R2\_001\_fastqc.html

## General Statistics Articular Cartilage

Copy table

Configure Columns

Plot

Showing 96/96 rows and 3/5 columns.

| Sample Name                      | % Dups | % GC | M Seqs |
|----------------------------------|--------|------|--------|
| LIB053209_TRA00222266_S49_R1_001 |        |      |        |
| LIB053209_TRA00222266_S49_R2_001 |        |      |        |
| LIB053209_TRA00222267_S50_R1_001 |        |      |        |
| LIB053209_TRA00222267_S50_R2_001 |        |      |        |
| LIB053209_TRA00222268_S51_R1_001 |        |      |        |
| LIB053209_TRA00222268_S51_R2_001 |        |      |        |
| LIB053209_TRA00222269_S52_R1_001 |        |      |        |
| LIB053209_TRA00222269_S52_R2_001 |        |      |        |
| LIB053209_TRA00222270_S53_R1_001 |        |      |        |
| LIB053209_TRA00222270_S53_R2_001 |        |      |        |
| LIB053209_TRA00222271_S54_R1_001 |        |      |        |
| LIB053209_TRA00222271_S54_R2_001 |        |      |        |
| LIB053209_TRA00222272_S55_R1_001 |        |      |        |
| LIB053209_TRA00222272_S55_R2_001 |        |      |        |
| LIB053209_TRA00222273_S56_R1_001 |        |      |        |
| LIB053209_TRA00222273_S56_R2_001 |        |      |        |
| LIB053209_TRA00222274_S57_R1_001 |        |      |        |
| LIB053209_TRA00222274_S57_R2_001 |        |      |        |
| LIB053209_TRA00222275_S58_R1_001 |        |      |        |
| LIB053209_TRA00222275_S58_R2_001 |        |      |        |
| LIB053209_TRA00222276_S59_R1_001 |        |      |        |
| LIB053209_TRA00222276_S59_R2_001 |        |      |        |
| LIB053209_TRA00222277_S60_R1_001 |        |      |        |
| LIB053209_TRA00222277_S60_R2_001 |        |      |        |
| LIB053209_TRA00222278_S61_R1_001 |        |      |        |
| LIB053209_TRA00222278_S61_R2_001 |        |      |        |

| Sample Name                      | % Dups | % GC | M Seqs |
|----------------------------------|--------|------|--------|
| LIB053209_TRA00222279_S62_R1_001 |        |      |        |
| LIB053209_TRA00222279_S62_R2_001 |        |      |        |
| LIB053209_TRA00222280_S63_R1_001 |        |      |        |
| LIB053209_TRA00222280_S63_R2_001 |        |      |        |
| LIB053209_TRA00222281_S64_R1_001 |        |      |        |
| LIB053209_TRA00222281_S64_R2_001 |        |      |        |
| LIB053209_TRA00222282_S65_R1_001 |        |      |        |
| LIB053209_TRA00222282_S65_R2_001 |        |      |        |
| LIB053209_TRA00222283_S66_R1_001 |        |      |        |
| LIB053209_TRA00222283_S66_R2_001 |        |      |        |
| LIB053209_TRA00222284_S67_R1_001 |        |      |        |
| LIB053209_TRA00222284_S67_R2_001 |        |      |        |
| LIB053209_TRA00222285_S68_R1_001 |        |      |        |
| LIB053209_TRA00222285_S68_R2_001 |        |      |        |
| LIB053209_TRA00222286_S69_R1_001 |        |      |        |
| LIB053209_TRA00222286_S69_R2_001 |        |      |        |
| LIB053209_TRA00222287_S70_R1_001 |        |      |        |
| LIB053209_TRA00222287_S70_R2_001 |        |      |        |
| LIB053209_TRA00222288_S71_R1_001 |        |      |        |
| LIB053209_TRA00222288_S71_R2_001 |        |      |        |
| LIB053209_TRA00222289_S72_R1_001 |        |      |        |
| LIB053209_TRA00222289_S72_R2_001 |        |      |        |
| LIB053209_TRA00222290_S73_R1_001 |        |      |        |
| LIB053209_TRA00222290_S73_R2_001 |        |      |        |
| LIB053209_TRA00222291_S74_R1_001 |        |      |        |
| LIB053209_TRA00222291_S74_R2_001 |        |      |        |
| LIB053209_TRA00222292_S75_R1_001 |        |      |        |
| LIB053209_TRA00222292_S75_R2_001 |        |      |        |
| LIB053209_TRA00222293_S76_R1_001 |        |      |        |
| LIB053209_TRA00222293_S76_R2_001 |        |      |        |
| LIB053209_TRA00222294_S77_R1_001 |        |      |        |
| LIB053209_TRA00222294_S77_R2_001 |        |      |        |
| LIB053209_TRA00222295_S78_R1_001 |        |      |        |
| LIB053209_TRA00222295_S78_R2_001 |        |      |        |
| LIB053209_TRA00222296_S79_R1_001 |        |      |        |
| LIB053209_TRA00222296_S79_R2_001 |        |      |        |
| LIB053209_TRA00222297_S80_R1_001 |        |      |        |
| LIB053209_TRA00222297_S80_R2_001 |        |      |        |
| LIB053209_TRA00222298_S81_R1_001 |        |      |        |
| LIB053209_TRA00222298_S81_R2_001 |        |      |        |
| LIB053209_TRA00222299_S82_R1_001 |        |      |        |
| LIB053209_TRA00222299_S82_R2_001 |        |      |        |
| LIB053209_TRA00222300_S83_R1_001 |        |      |        |
| LIB053209_TRA00222300_S83_R2_001 |        |      |        |
| LIB053209_TRA00222301_S84_R1_001 |        |      |        |
| LIB053209_TRA00222301_S84_R2_001 |        |      |        |

| Sample Name                      | % Dups | % GC | M Seqs |
|----------------------------------|--------|------|--------|
| LIB053209_TRA00222302_S85_R1_001 |        |      |        |
| LIB053209_TRA00222302_S85_R2_001 |        |      |        |
| LIB053209_TRA00222303_S86_R1_001 |        |      |        |
| LIB053209_TRA00222303_S86_R2_001 |        |      |        |
| LIB053209_TRA00222304_S87_R1_001 |        |      |        |
| LIB053209_TRA00222304_S87_R2_001 |        |      |        |
| LIB053209_TRA00222305_S88_R1_001 |        |      |        |
| LIB053209_TRA00222305_S88_R2_001 |        |      |        |
| LIB053209_TRA00222306_S89_R1_001 |        |      |        |
| LIB053209_TRA00222306_S89_R2_001 |        |      |        |
| LIB053209_TRA00222307_S90_R1_001 |        |      |        |
| LIB053209_TRA00222307_S90_R2_001 |        |      |        |
| LIB053209_TRA00222308_S91_R1_001 |        |      |        |
| LIB053209_TRA00222308_S91_R2_001 |        |      |        |
| LIB053209_TRA00222309_S92_R1_001 |        |      |        |
| LIB053209_TRA00222309_S92_R2_001 |        |      |        |
| LIB053209_TRA00222310_S93_R1_001 |        |      |        |
| LIB053209_TRA00222310_S93_R2_001 |        |      |        |
| LIB053209_TRA00222311_S94_R1_001 |        |      |        |
| LIB053209_TRA00222311_S94_R2_001 |        |      |        |
| LIB053209_TRA00222312_S95_R1_001 |        |      |        |
| LIB053209_TRA00222312_S95_R2_001 |        |      |        |
| LIB053209_TRA00222313_S96_R1_001 |        |      |        |
| LIB053209_TRA00222313_S96_R2_001 |        |      |        |

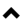

# FastQC

FastQC (<http://www.bioinformatics.babraham.ac.uk/projects/fastqc/>) is a quality control tool for high throughput sequence data, written by Simon Andrews at the Babraham Institute in Cambridge.

## Sequence Counts

Help

Sequence counts for each sample. Duplicate read counts are an estimate only.

Number of readsPercentages

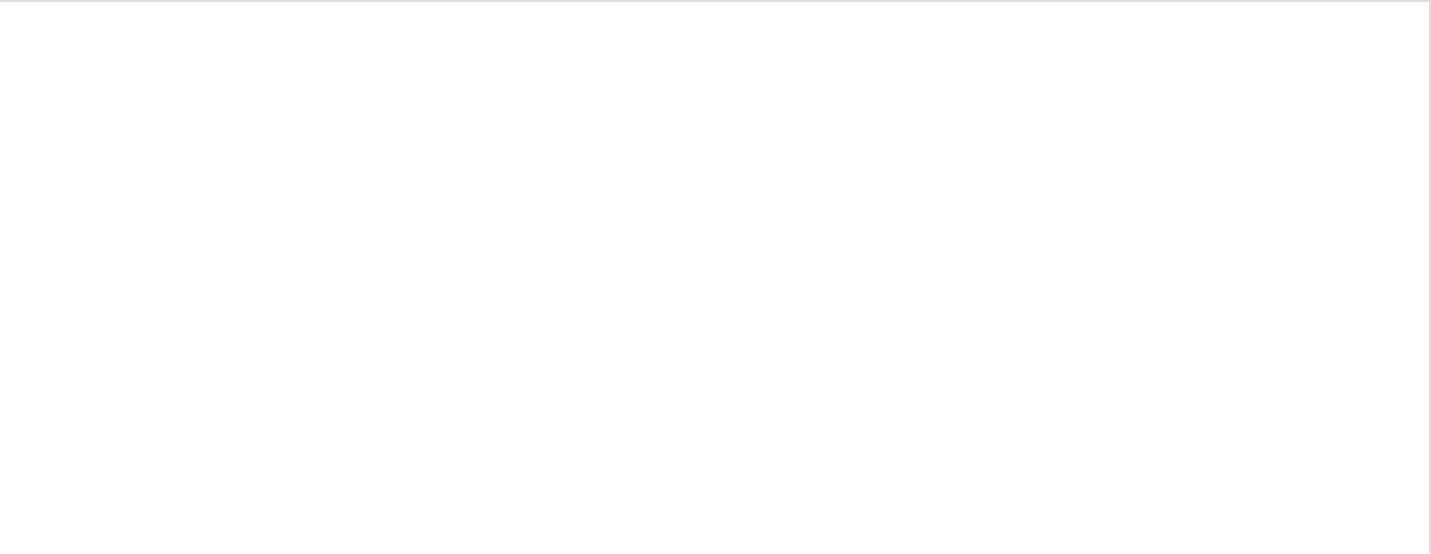

FastQC: Sequence Counts

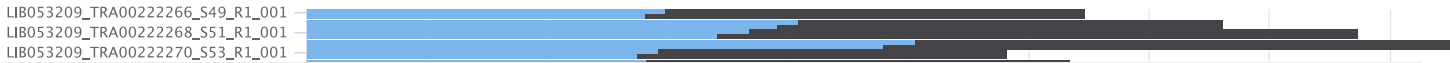

Sequence Quality Histograms

96

Help

The mean quality value across each base position in the read.

FastQC: Mean Quality Scores

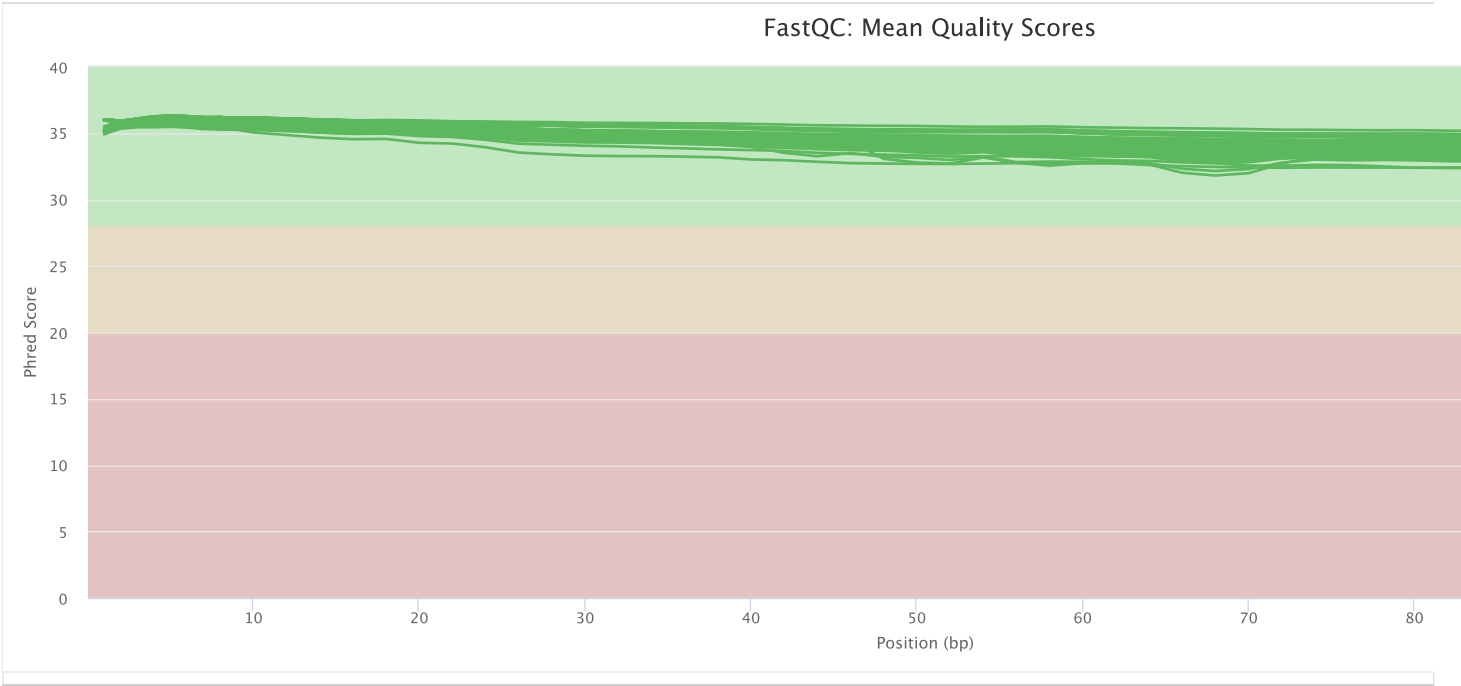

Per Sequence Quality Scores

96

Help

The number of reads with average quality scores. Shows if a subset of reads has poor quality.

FastQC: Per Sequence Quality Scores

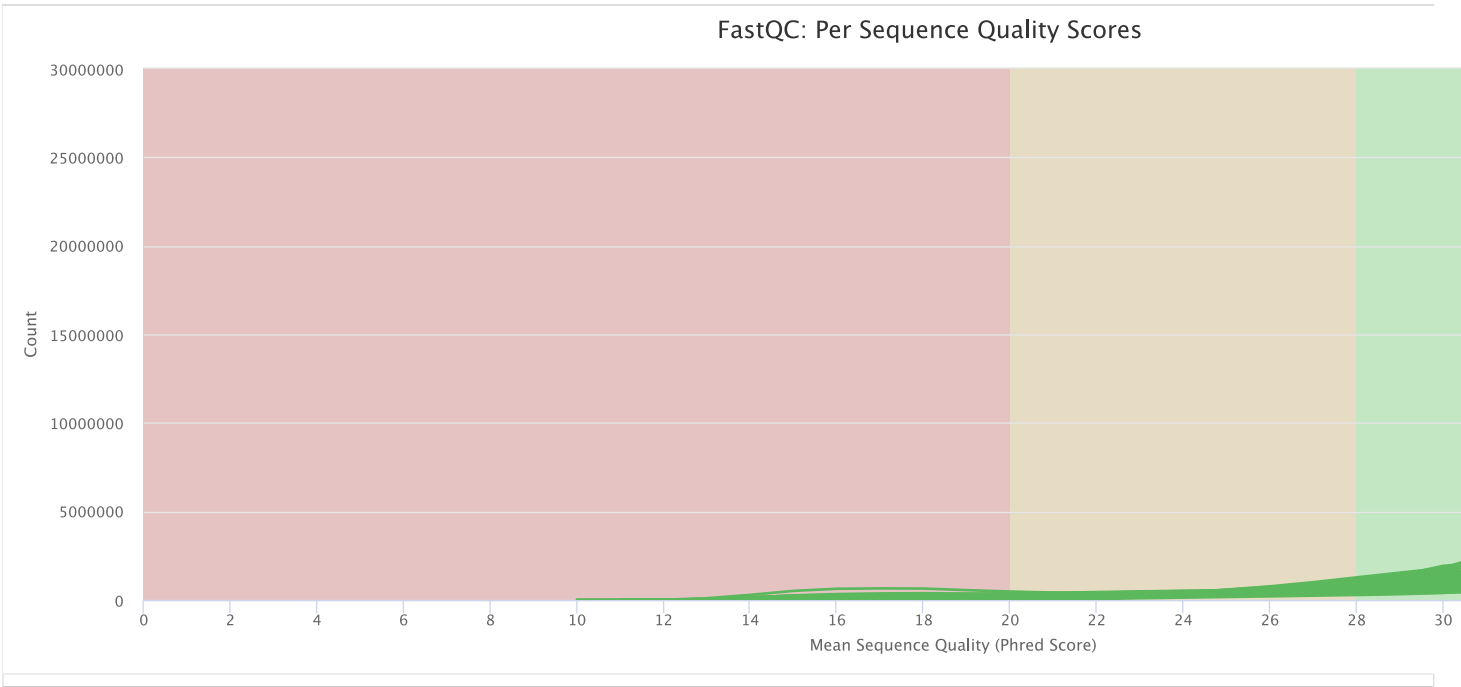

Per Base Sequence Content

0 96

Help

The proportion of each base position for which each of the four normal DNA bases has been called.

Click a sample row to see a line plot for that dataset.

**Rollover for sample name**

Position: -    %T: -    %C: -    %A: -    %G: -

[Export Plot](#)

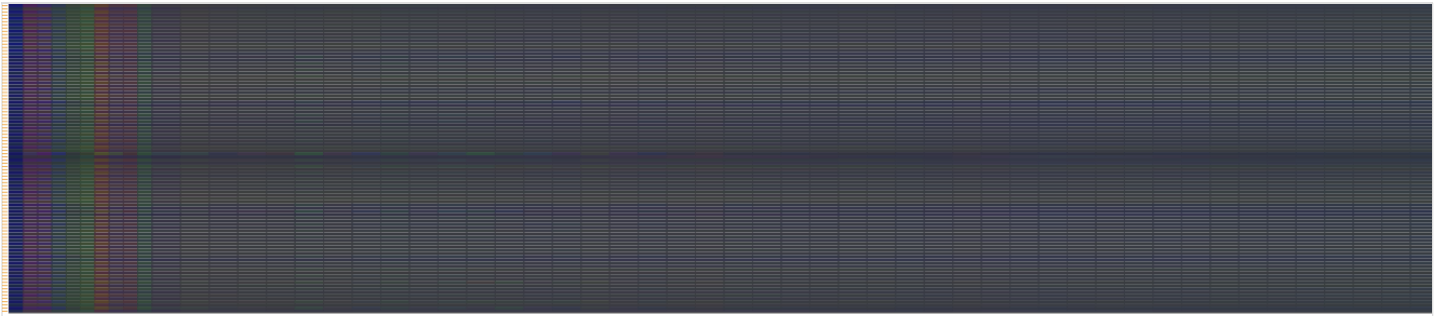

## Per Sequence GC Content

20    76

[Help](#)

The average GC content of reads. Normal random library typically have a roughly normal distribution of GC content.

[Percentages](#)   [Counts](#)

FastQC: Per Sequence GC Content

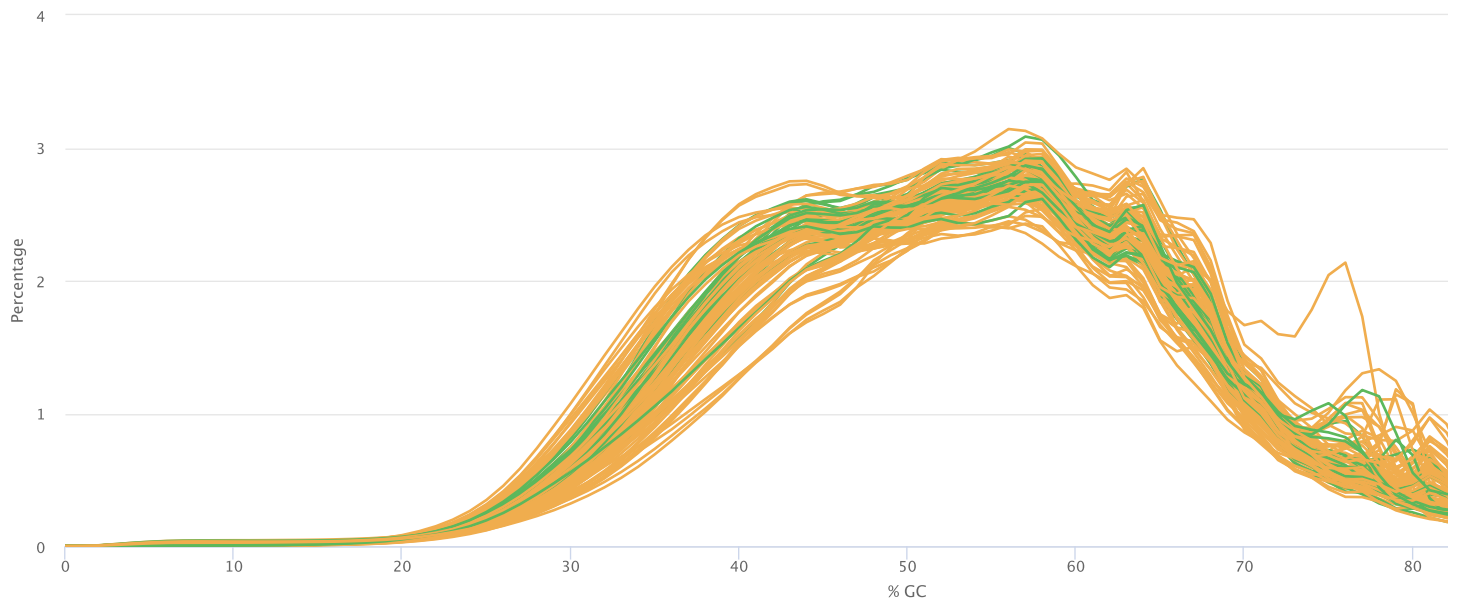

## Per Base N Content

96

[Help](#)

The percentage of base calls at each position for which an N was called.

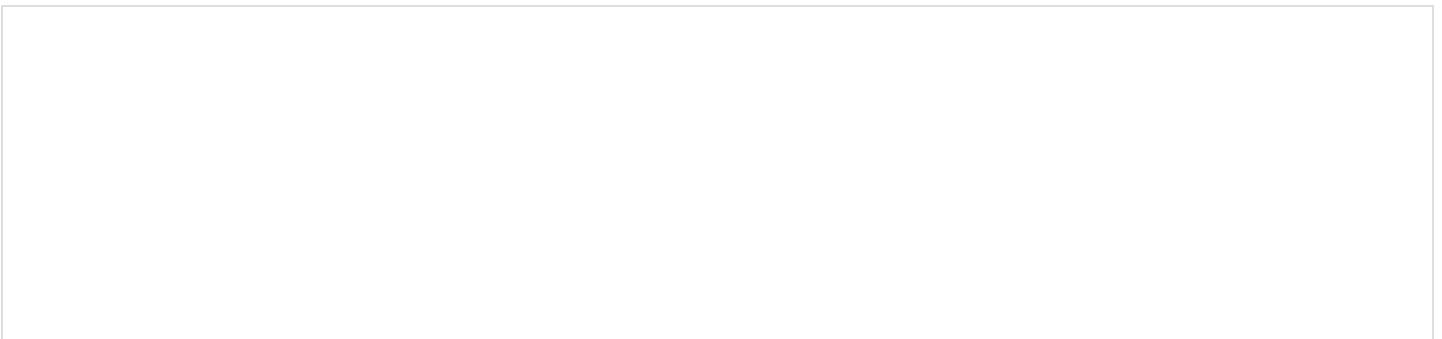

FastQC: Per Base N Content

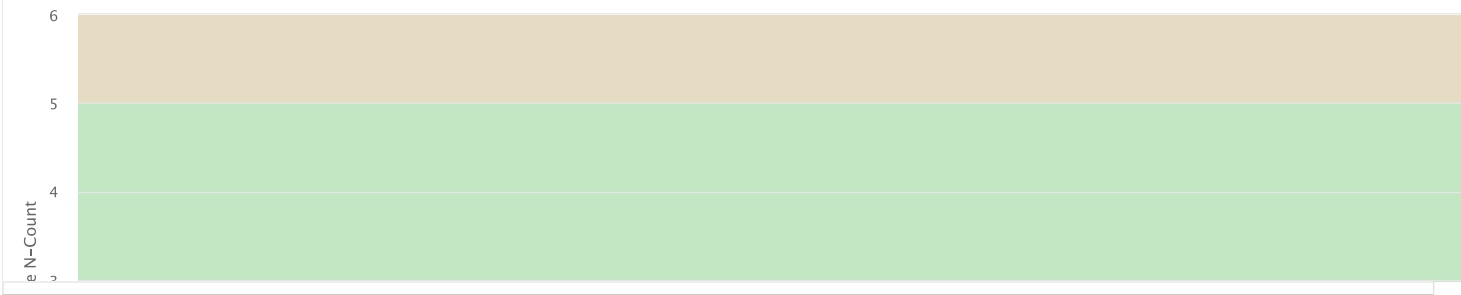

Sequence Length Distribution

96

All samples have sequences of a single length (100bp).

Sequence Duplication Levels

0 68 28

Help

The relative level of duplication found for every sequence.

FastQC: Sequence Duplication Levels

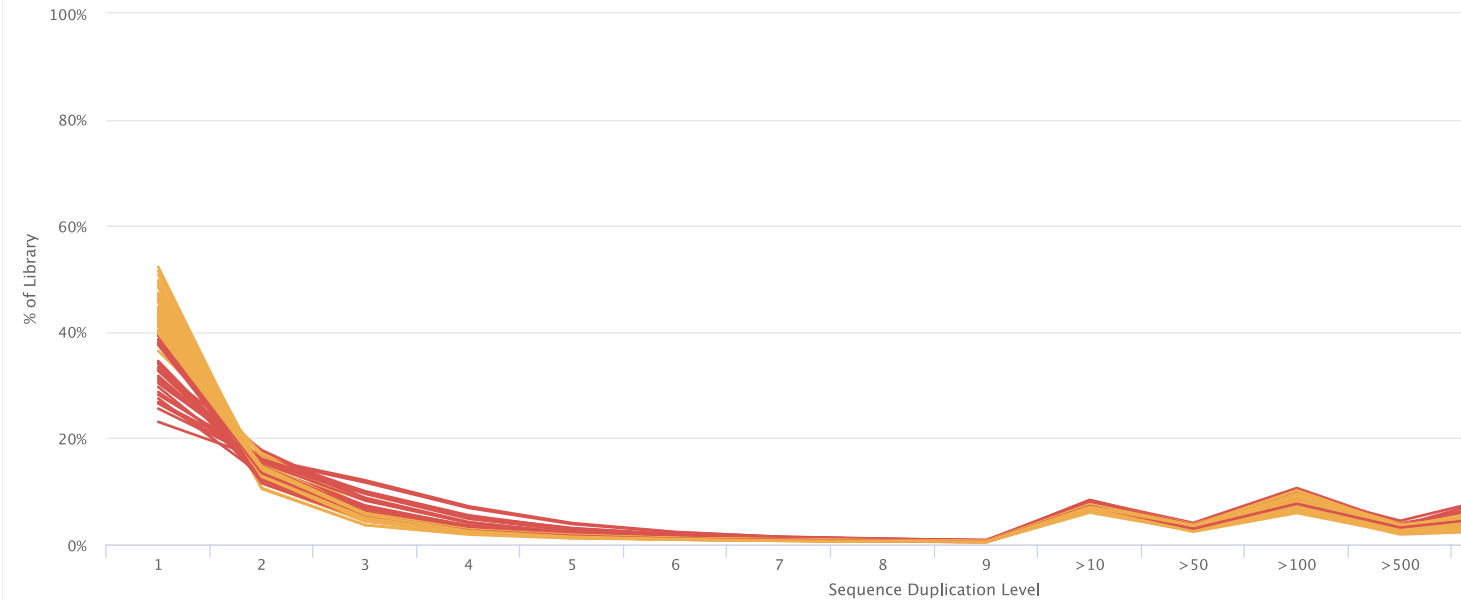

Overrepresented sequences

0 86 10

Help

The total amount of overrepresented sequences found in each library.

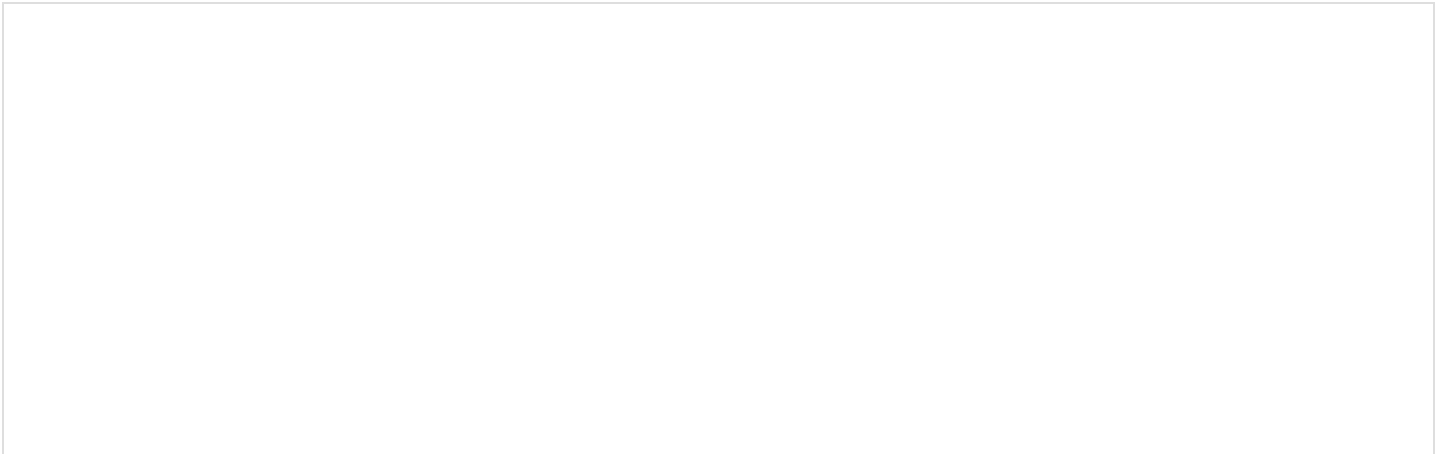

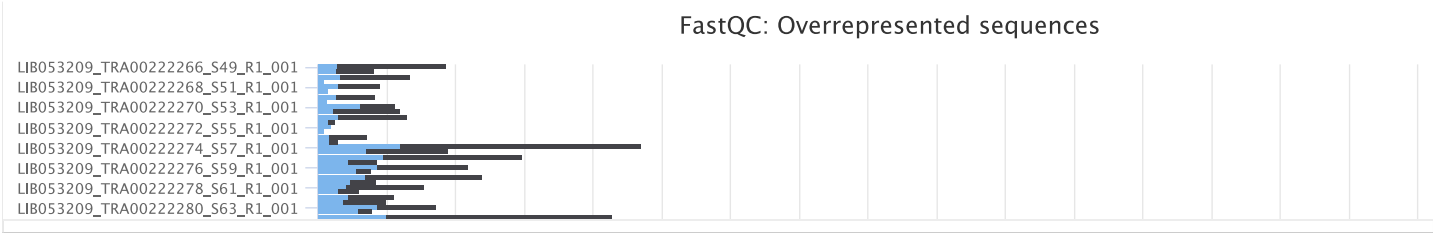

## Adapter Content

2076

Help

The cumulative percentage count of the proportion of your library which has seen each of the adapter sequences at each position.

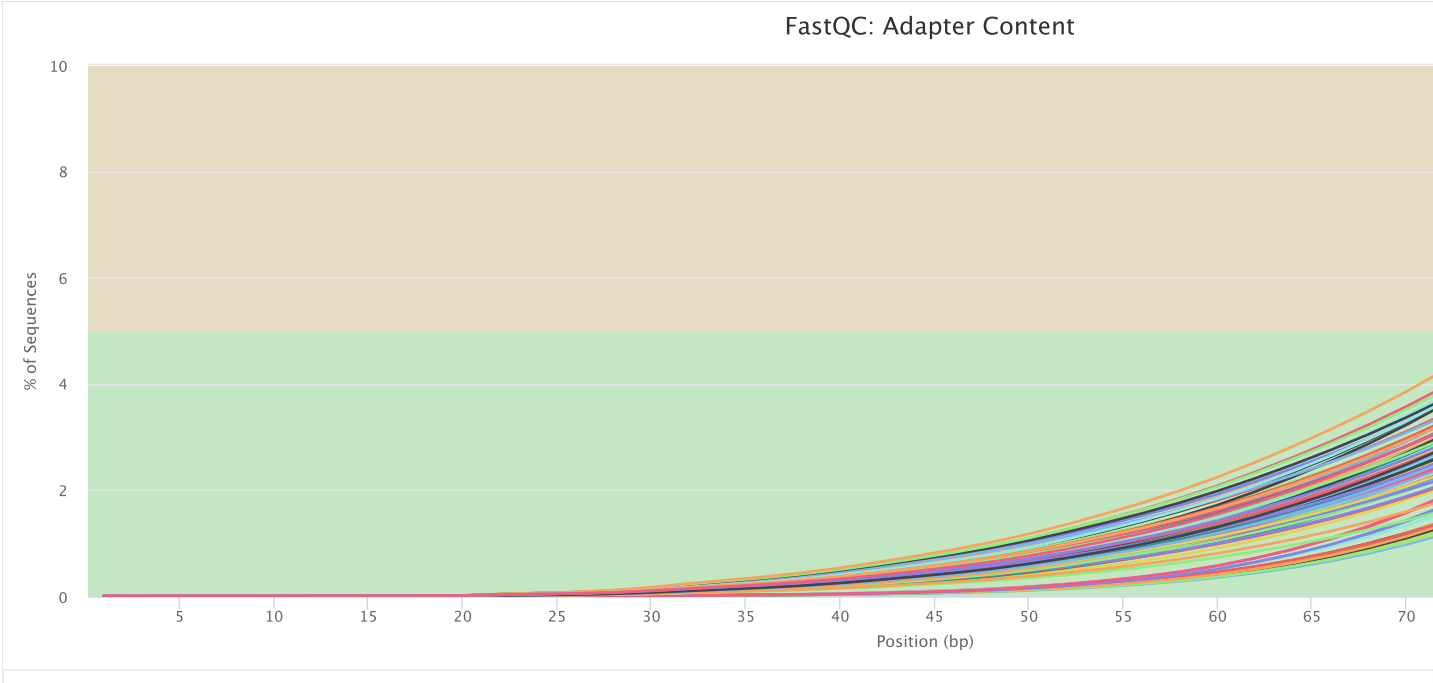

## Status Checks

Sort by highlight

Help

Status for each FastQC section showing whether results seem entirely normal (green), slightly abnormal (orange) or very unusual (red).

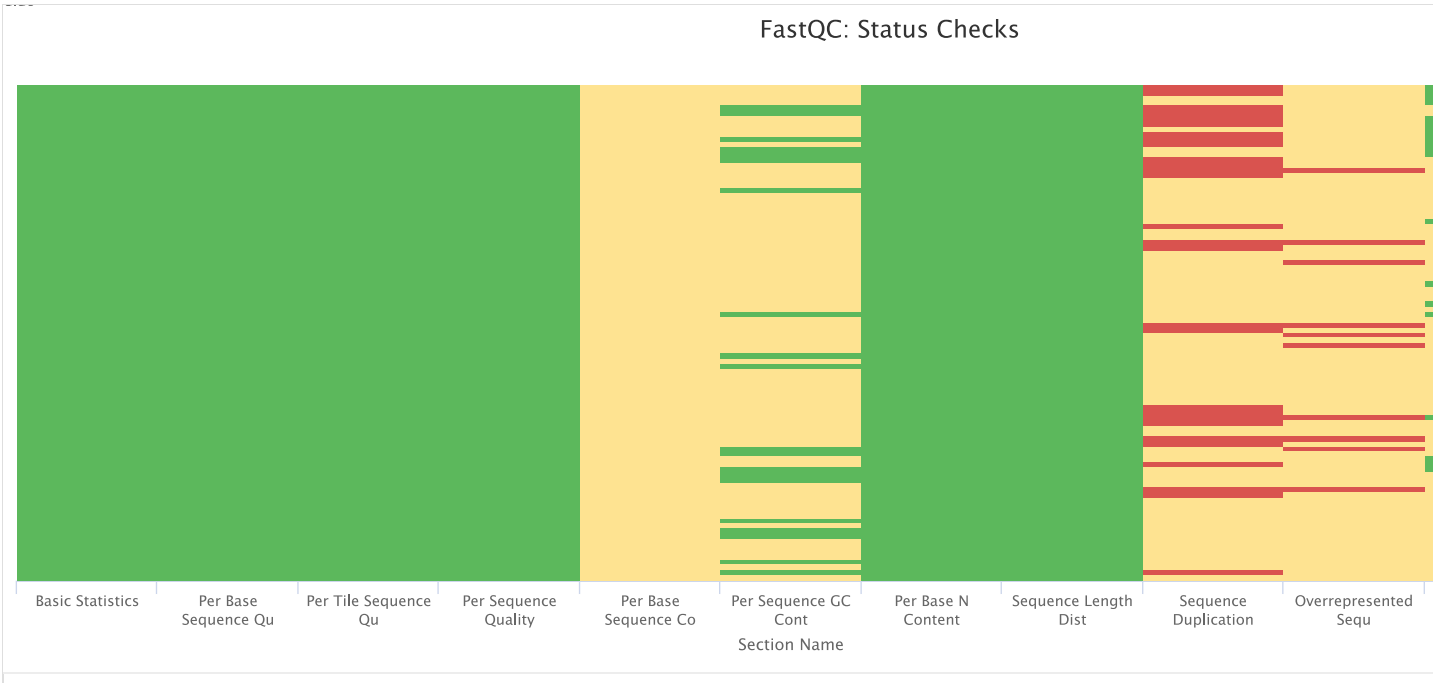

---

**MultiQC v1.9** (<http://multiqc.info>) - Written by [Phil Ewels](http://phil.ewels.co.uk), available on [GitHub](https://github.com/ewels/MultiQC).  
This report uses [HighCharts](http://www.highcharts.com/), [jQuery](https://jquery.com/), [jQuery UI](https://jqueryui.com/), [Bootstrap](http://getbootstrap.com/), [FileSaver.js](https://github.com/eligrey/FileSaver.js) and [clipboard.js](https://clipboardjs.com/).

**SciLifeLab** (<http://www.scilifelab.se/>)



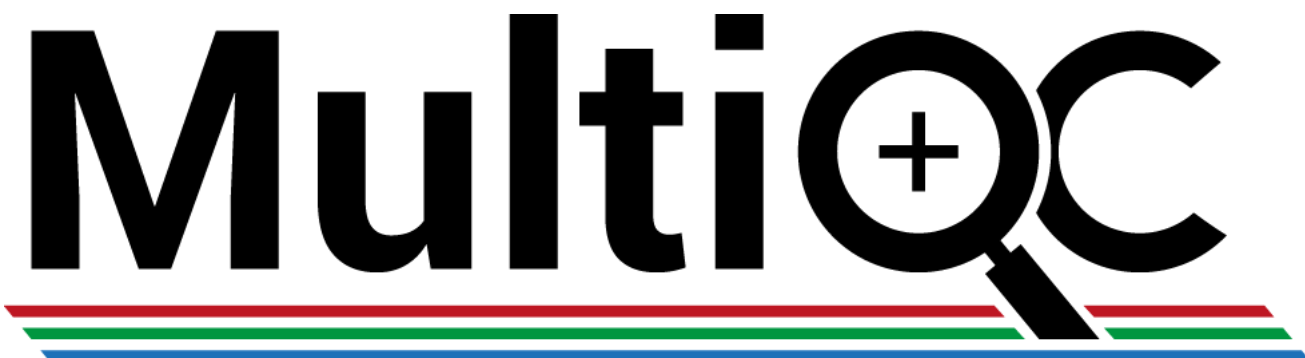

(<http://multiqc.info>)

# Synovium

A modular tool to aggregate results from bioinformatics analyses across many samples into a single report.

Report generated on 2022-08-15, 21:57 based on data in:

- /n/scratch3/users/j/jid4/Synovium\_long\_term/fastqc\_results/LIB053209\_TRA00222218\_S1\_R1\_001\_fastqc.html
- /n/scratch3/users/j/jid4/Synovium\_long\_term/fastqc\_results/LIB053209\_TRA00222218\_S1\_R1\_001\_fastqc.zip
- /n/scratch3/users/j/jid4/Synovium\_long\_term/fastqc\_results/LIB053209\_TRA00222218\_S1\_R2\_001\_fastqc.html

## General Statistics

Copy table

Configure Columns

Plot

Showing 96/96 rows and 3/5 columns.

| Sample Name                      | % Dups | % GC | M Seqs |
|----------------------------------|--------|------|--------|
| LIB053209_TRA00222218_S1_R1_001  |        |      |        |
| LIB053209_TRA00222218_S1_R2_001  |        |      |        |
| LIB053209_TRA00222219_S2_R1_001  |        |      |        |
| LIB053209_TRA00222219_S2_R2_001  |        |      |        |
| LIB053209_TRA00222220_S3_R1_001  |        |      |        |
| LIB053209_TRA00222220_S3_R2_001  |        |      |        |
| LIB053209_TRA00222221_S4_R1_001  |        |      |        |
| LIB053209_TRA00222221_S4_R2_001  |        |      |        |
| LIB053209_TRA00222222_S5_R1_001  |        |      |        |
| LIB053209_TRA00222222_S5_R2_001  |        |      |        |
| LIB053209_TRA00222223_S6_R1_001  |        |      |        |
| LIB053209_TRA00222223_S6_R2_001  |        |      |        |
| LIB053209_TRA00222224_S7_R1_001  |        |      |        |
| LIB053209_TRA00222224_S7_R2_001  |        |      |        |
| LIB053209_TRA00222225_S8_R1_001  |        |      |        |
| LIB053209_TRA00222225_S8_R2_001  |        |      |        |
| LIB053209_TRA00222226_S9_R1_001  |        |      |        |
| LIB053209_TRA00222226_S9_R2_001  |        |      |        |
| LIB053209_TRA00222227_S10_R1_001 |        |      |        |
| LIB053209_TRA00222227_S10_R2_001 |        |      |        |
| LIB053209_TRA00222228_S11_R1_001 |        |      |        |
| LIB053209_TRA00222228_S11_R2_001 |        |      |        |
| LIB053209_TRA00222229_S12_R1_001 |        |      |        |
| LIB053209_TRA00222229_S12_R2_001 |        |      |        |
| LIB053209_TRA00222230_S13_R1_001 |        |      |        |
| LIB053209_TRA00222230_S13_R2_001 |        |      |        |

| Sample Name                      | % Dups | % GC | M Seqs |
|----------------------------------|--------|------|--------|
| LIB053209_TRA00222231_S14_R1_001 |        |      |        |
| LIB053209_TRA00222231_S14_R2_001 |        |      |        |
| LIB053209_TRA00222232_S15_R1_001 |        |      |        |
| LIB053209_TRA00222232_S15_R2_001 |        |      |        |
| LIB053209_TRA00222233_S16_R1_001 |        |      |        |
| LIB053209_TRA00222233_S16_R2_001 |        |      |        |
| LIB053209_TRA00222234_S17_R1_001 |        |      |        |
| LIB053209_TRA00222234_S17_R2_001 |        |      |        |
| LIB053209_TRA00222235_S18_R1_001 |        |      |        |
| LIB053209_TRA00222235_S18_R2_001 |        |      |        |
| LIB053209_TRA00222236_S19_R1_001 |        |      |        |
| LIB053209_TRA00222236_S19_R2_001 |        |      |        |
| LIB053209_TRA00222237_S20_R1_001 |        |      |        |
| LIB053209_TRA00222237_S20_R2_001 |        |      |        |
| LIB053209_TRA00222238_S21_R1_001 |        |      |        |
| LIB053209_TRA00222238_S21_R2_001 |        |      |        |
| LIB053209_TRA00222239_S22_R1_001 |        |      |        |
| LIB053209_TRA00222239_S22_R2_001 |        |      |        |
| LIB053209_TRA00222240_S23_R1_001 |        |      |        |
| LIB053209_TRA00222240_S23_R2_001 |        |      |        |
| LIB053209_TRA00222241_S24_R1_001 |        |      |        |
| LIB053209_TRA00222241_S24_R2_001 |        |      |        |
| LIB053209_TRA00222242_S25_R1_001 |        |      |        |
| LIB053209_TRA00222242_S25_R2_001 |        |      |        |
| LIB053209_TRA00222243_S26_R1_001 |        |      |        |
| LIB053209_TRA00222243_S26_R2_001 |        |      |        |
| LIB053209_TRA00222244_S27_R1_001 |        |      |        |
| LIB053209_TRA00222244_S27_R2_001 |        |      |        |
| LIB053209_TRA00222245_S28_R1_001 |        |      |        |
| LIB053209_TRA00222245_S28_R2_001 |        |      |        |
| LIB053209_TRA00222246_S29_R1_001 |        |      |        |
| LIB053209_TRA00222246_S29_R2_001 |        |      |        |
| LIB053209_TRA00222247_S30_R1_001 |        |      |        |
| LIB053209_TRA00222247_S30_R2_001 |        |      |        |
| LIB053209_TRA00222248_S31_R1_001 |        |      |        |
| LIB053209_TRA00222248_S31_R2_001 |        |      |        |
| LIB053209_TRA00222249_S32_R1_001 |        |      |        |
| LIB053209_TRA00222249_S32_R2_001 |        |      |        |
| LIB053209_TRA00222250_S33_R1_001 |        |      |        |
| LIB053209_TRA00222250_S33_R2_001 |        |      |        |
| LIB053209_TRA00222251_S34_R1_001 |        |      |        |
| LIB053209_TRA00222251_S34_R2_001 |        |      |        |
| LIB053209_TRA00222252_S35_R1_001 |        |      |        |
| LIB053209_TRA00222252_S35_R2_001 |        |      |        |
| LIB053209_TRA00222253_S36_R1_001 |        |      |        |
| LIB053209_TRA00222253_S36_R2_001 |        |      |        |

| Sample Name                      | % Dups | % GC | M Seqs |
|----------------------------------|--------|------|--------|
| LIB053209_TRA00222254_S37_R1_001 |        |      |        |
| LIB053209_TRA00222254_S37_R2_001 |        |      |        |
| LIB053209_TRA00222255_S38_R1_001 |        |      |        |
| LIB053209_TRA00222255_S38_R2_001 |        |      |        |
| LIB053209_TRA00222256_S39_R1_001 |        |      |        |
| LIB053209_TRA00222256_S39_R2_001 |        |      |        |
| LIB053209_TRA00222257_S40_R1_001 |        |      |        |
| LIB053209_TRA00222257_S40_R2_001 |        |      |        |
| LIB053209_TRA00222258_S41_R1_001 |        |      |        |
| LIB053209_TRA00222258_S41_R2_001 |        |      |        |
| LIB053209_TRA00222259_S42_R1_001 |        |      |        |
| LIB053209_TRA00222259_S42_R2_001 |        |      |        |
| LIB053209_TRA00222260_S43_R1_001 |        |      |        |
| LIB053209_TRA00222260_S43_R2_001 |        |      |        |
| LIB053209_TRA00222261_S44_R1_001 |        |      |        |
| LIB053209_TRA00222261_S44_R2_001 |        |      |        |
| LIB053209_TRA00222262_S45_R1_001 |        |      |        |
| LIB053209_TRA00222262_S45_R2_001 |        |      |        |
| LIB053209_TRA00222263_S46_R1_001 |        |      |        |
| LIB053209_TRA00222263_S46_R2_001 |        |      |        |
| LIB053209_TRA00222264_S47_R1_001 |        |      |        |
| LIB053209_TRA00222264_S47_R2_001 |        |      |        |
| LIB053209_TRA00222265_S48_R1_001 |        |      |        |
| LIB053209_TRA00222265_S48_R2_001 |        |      |        |

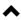

# FastQC

FastQC (<http://www.bioinformatics.babraham.ac.uk/projects/fastqc/>) is a quality control tool for high throughput sequence data, written by Simon Andrews at the Babraham Institute in Cambridge.

## Sequence Counts

 Help

Sequence counts for each sample. Duplicate read counts are an estimate only.

Number of reads

Percentages

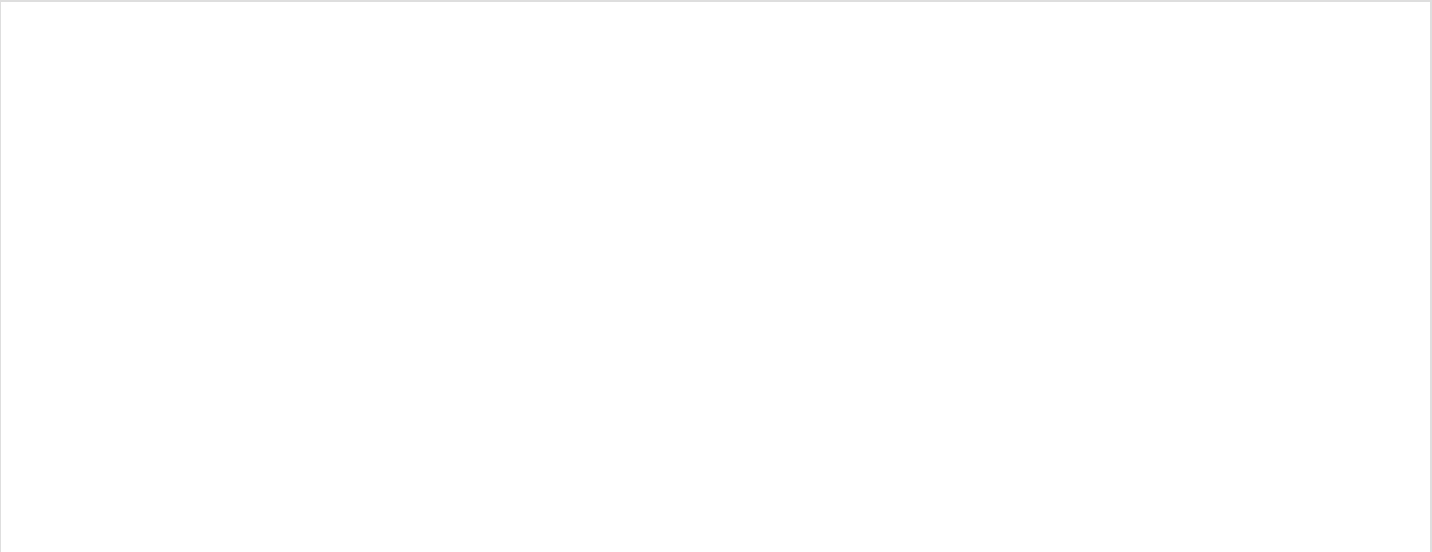

### FastQC: Sequence Counts

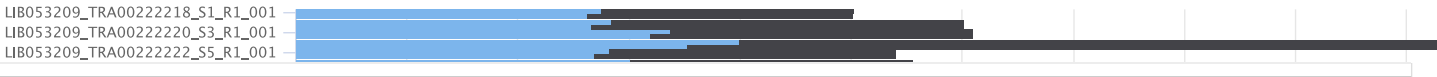

### Sequence Quality Histograms

96

Help

The mean quality value across each base position in the read.

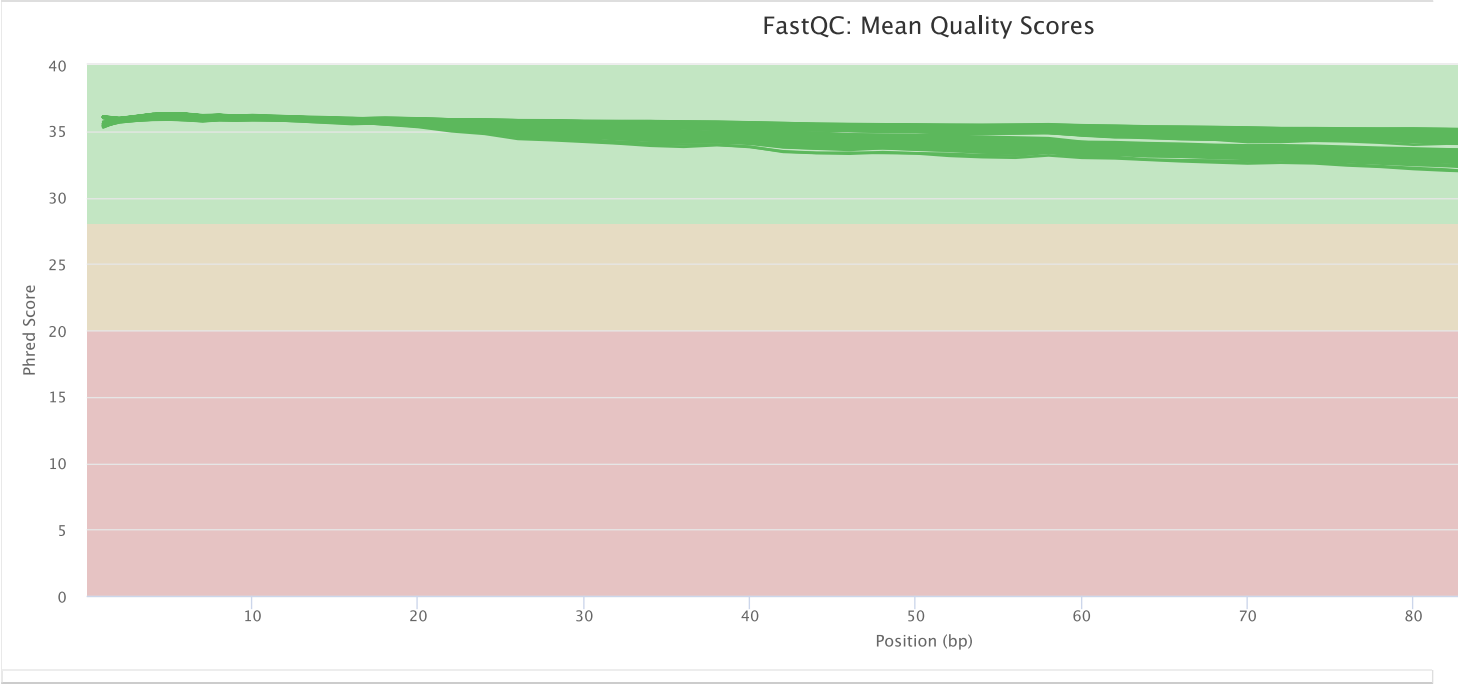

### Per Sequence Quality Scores

96

Help

The number of reads with average quality scores. Shows if a subset of reads has poor quality.

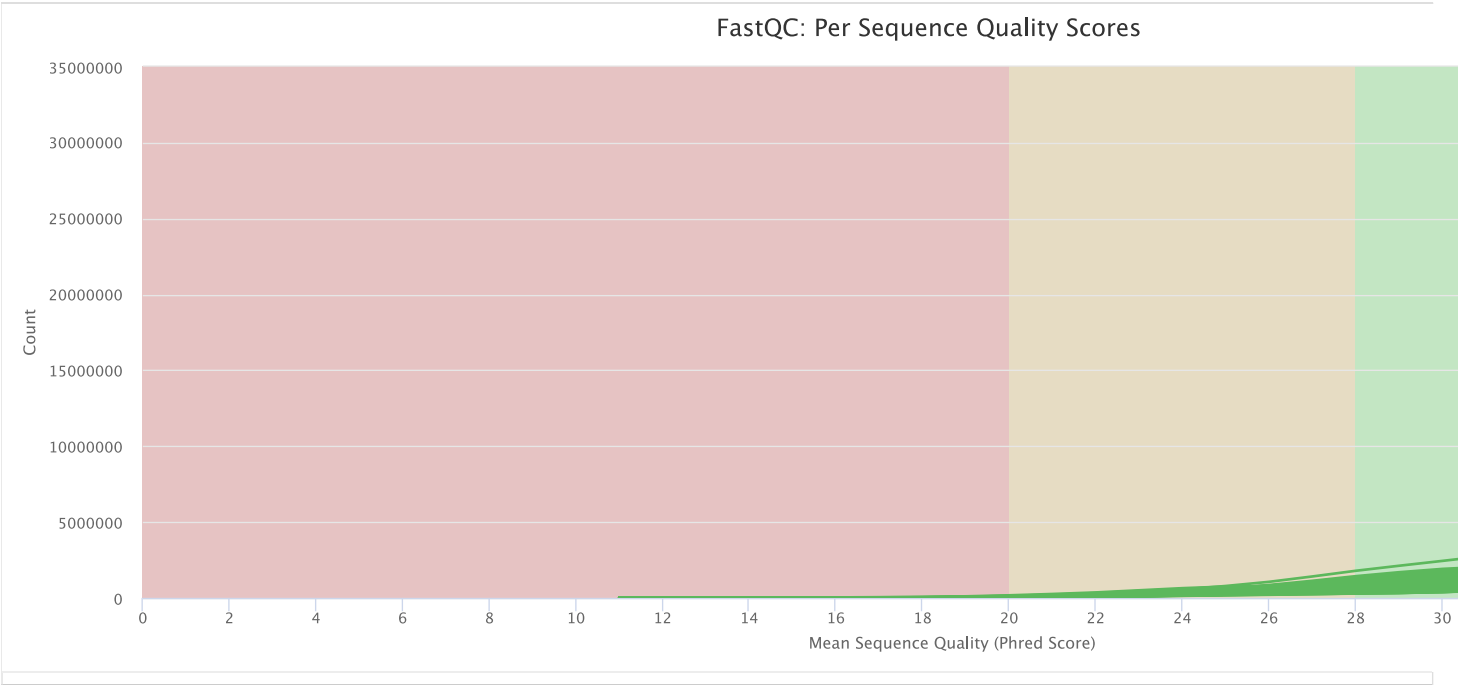

### Per Base Sequence Content

0 96

Help

The proportion of each base position for which each of the four normal DNA bases has been called.

🔗 Click a sample row to see a line plot for that dataset.

📘 Rollover for sample name

Position: -    %T: -    %C: -    %A: -    %G: -

📄 Export Plot

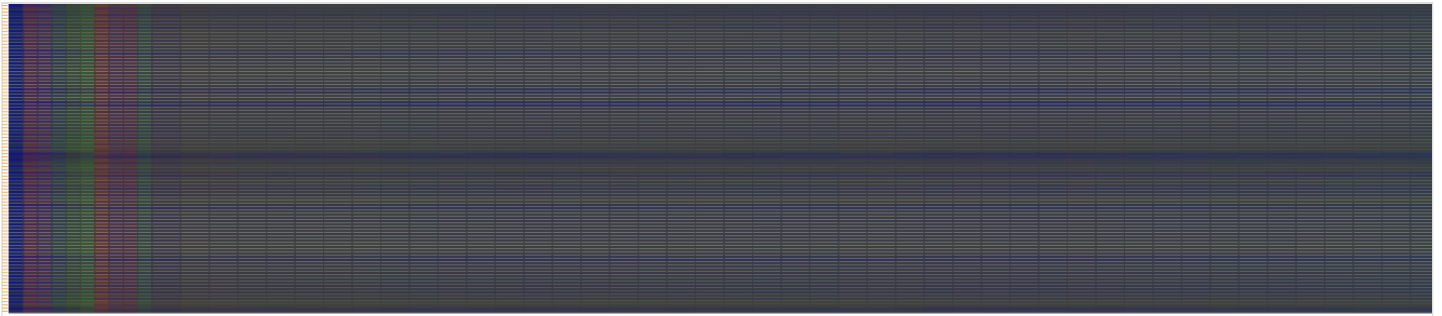

## Per Sequence GC Content

3 39 54

📘 Help

The average GC content of reads. Normal random library typically have a roughly normal distribution of GC content.

Percentages    Counts

FastQC: Per Sequence GC Content

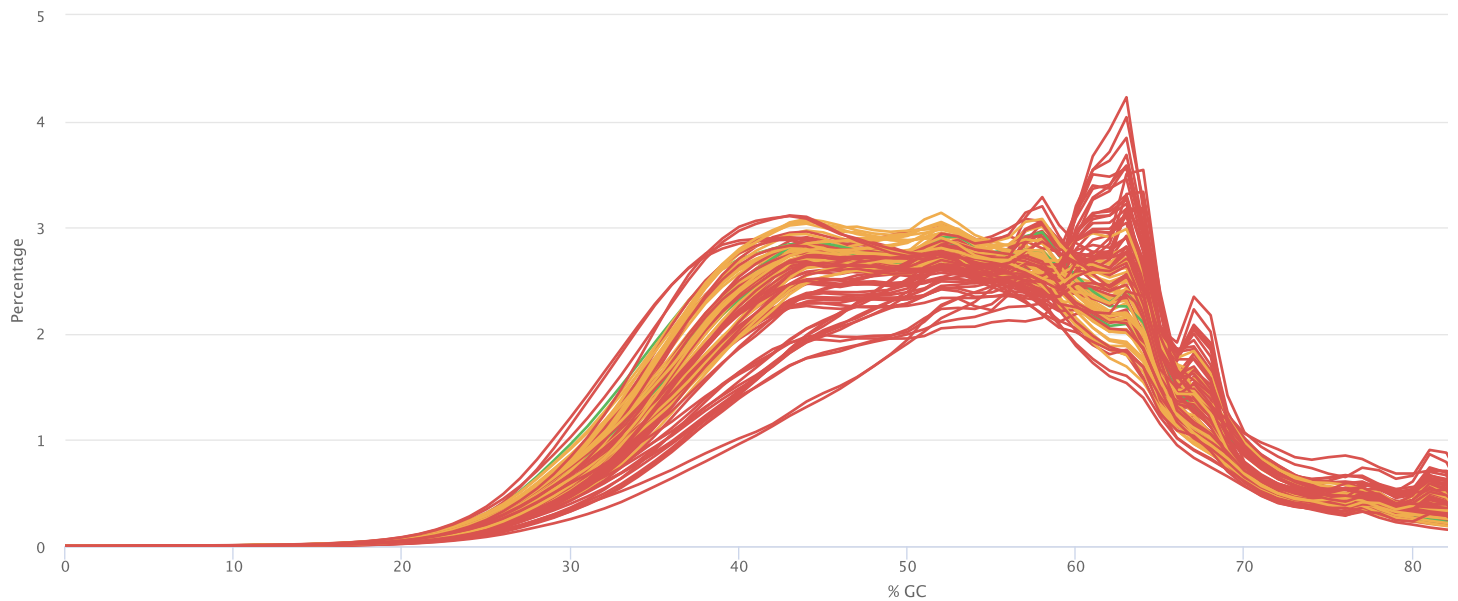

## Per Base N Content

96

📘 Help

The percentage of base calls at each position for which an N was called.



FastQC: Per Base N Content

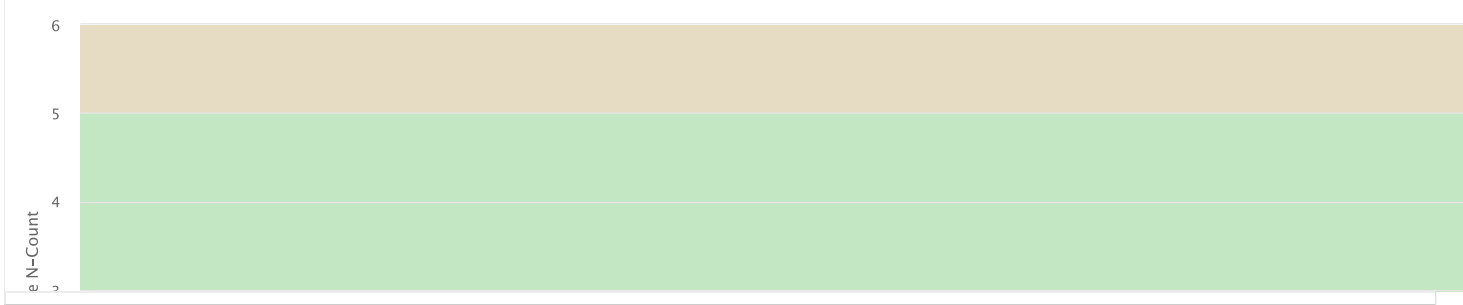

Sequence Length Distribution

96

All samples have sequences of a single length (100bp).

Sequence Duplication Levels

0 40 56

Help

The relative level of duplication found for every sequence.

FastQC: Sequence Duplication Levels

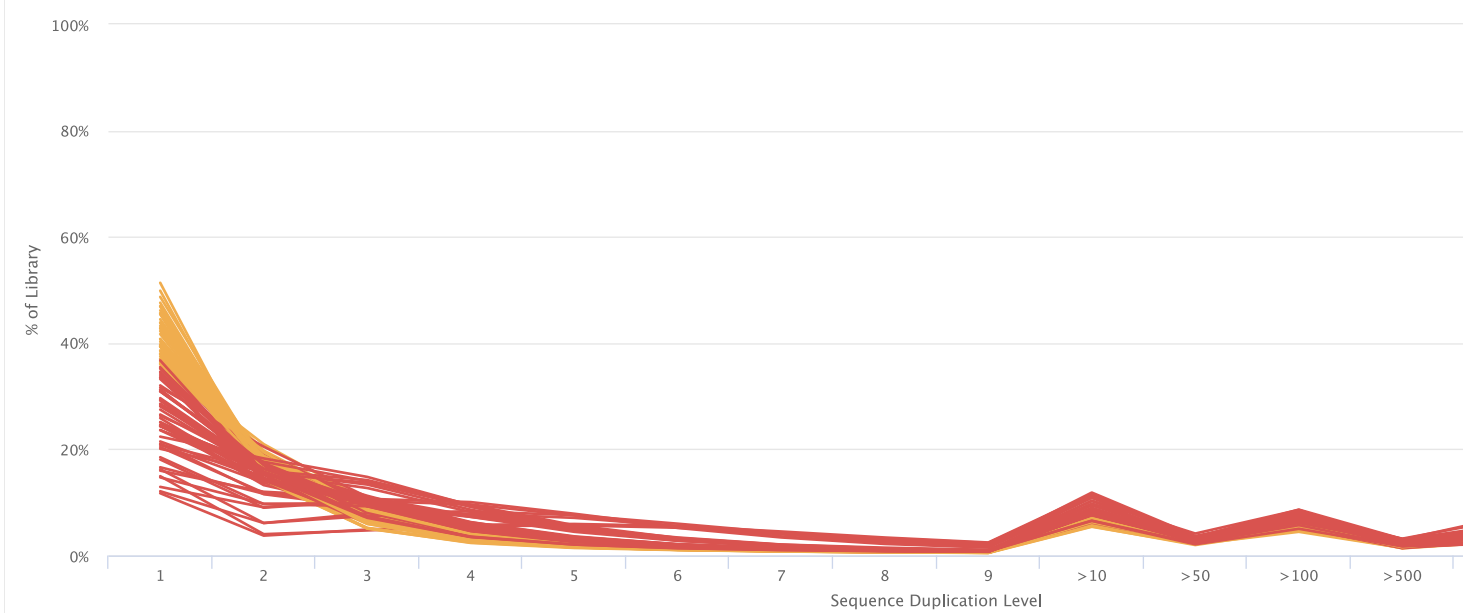

Overrepresented sequences

0 90 6

Help

The total amount of overrepresented sequences found in each library.

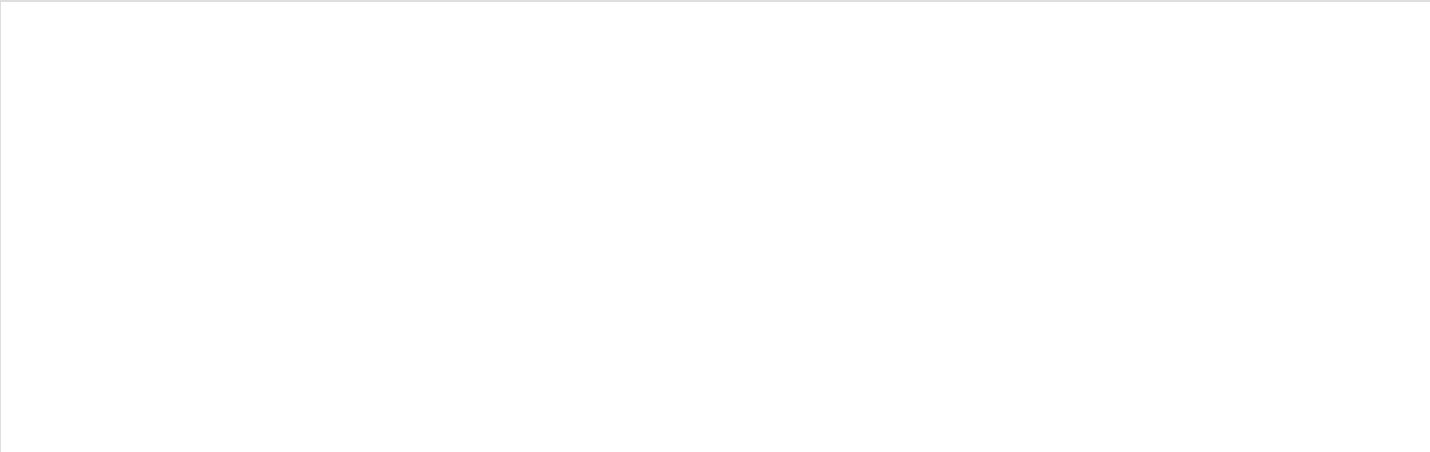

FastQC: Overrepresented sequences

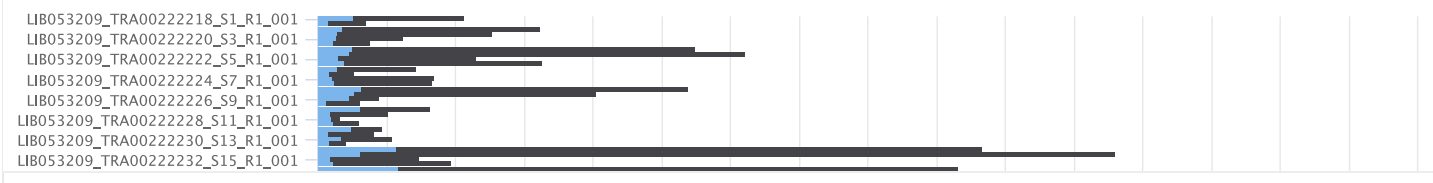

Adapter Content

61 35

Help

The cumulative percentage count of the proportion of your library which has seen each of the adapter sequences at each position.

FastQC: Adapter Content

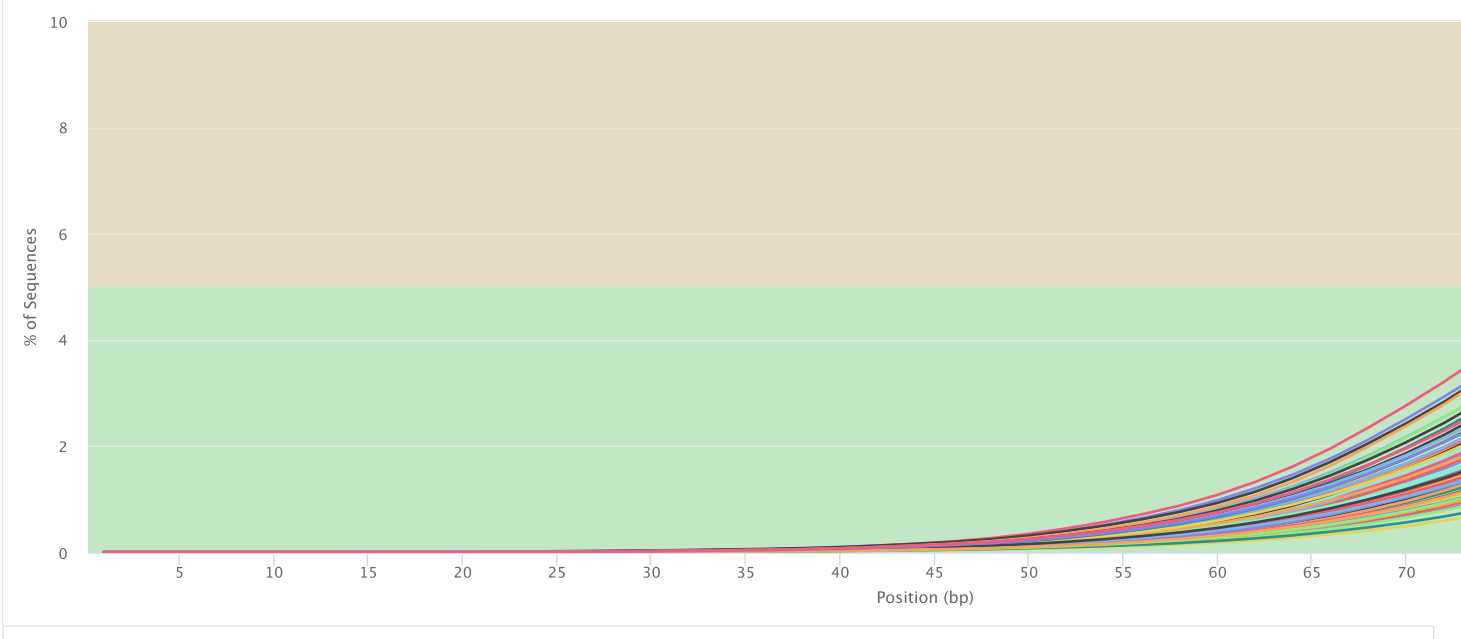

Status Checks

Help

Status for each FastQC section showing whether results seem entirely normal (green), slightly abnormal (orange) or very unusual (red).

Sort by highlight

FastQC: Status Checks

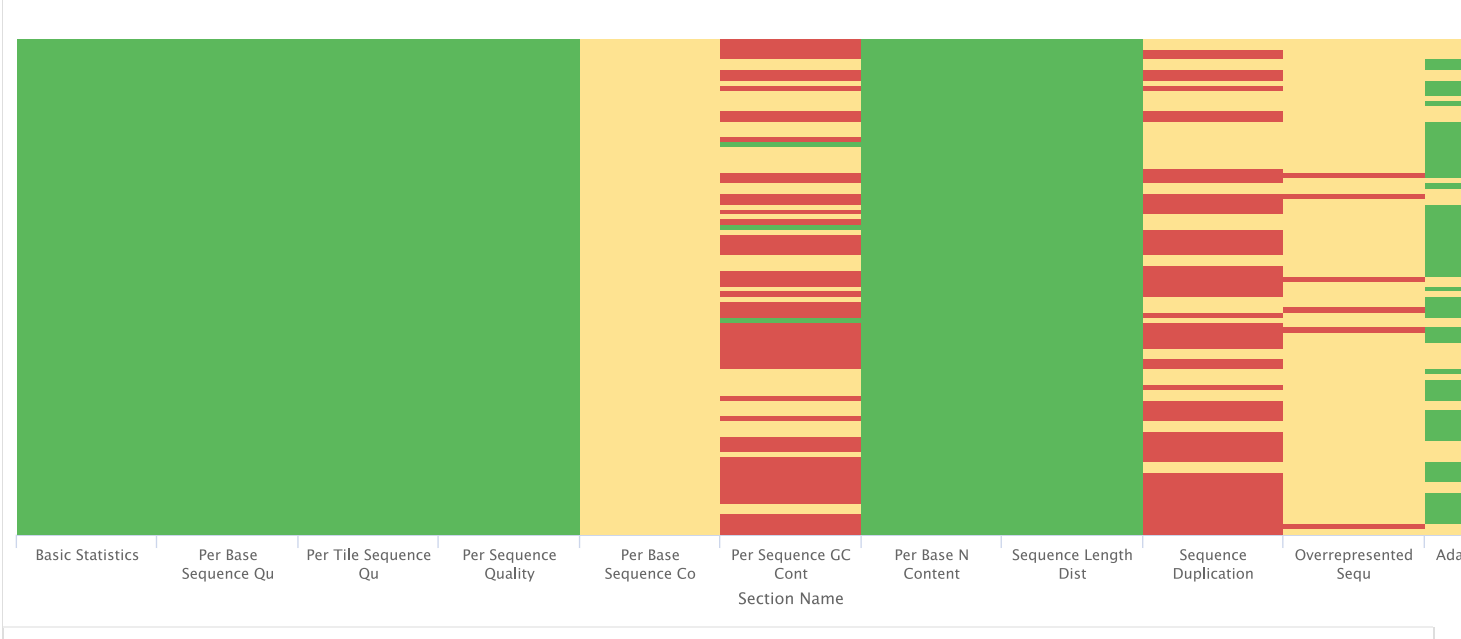

---

**MultiQC v1.9** (<http://multiqc.info>) - Written by [Phil Ewels](http://phil.ewels.co.uk), available on [GitHub](https://github.com/ewels/MultiQC).  
This report uses [HighCharts](http://www.highcharts.com/), [jQuery](https://jquery.com/), [jQuery UI](https://jqueryui.com/), [Bootstrap](http://getbootstrap.com/), [FileSaver.js](https://github.com/eligrey/FileSaver.js) and [clipboard.js](https://clipboardjs.com/).

**SciLifeLab** (<http://www.scilifelab.se/>)
