# Supplementary figures and images for: Responding to ACL Injury and its Treatments: Comparative Gene Expression between Articular Cartilage and Synovium
Source: MDPI journal article supplement (doi:10.3390/bioengineering10050527), 2023-04-26

# Likely outlier—52W Synovium ACLT sample #12 (aka INJ52\_SM\_12 or INJ52\_12)

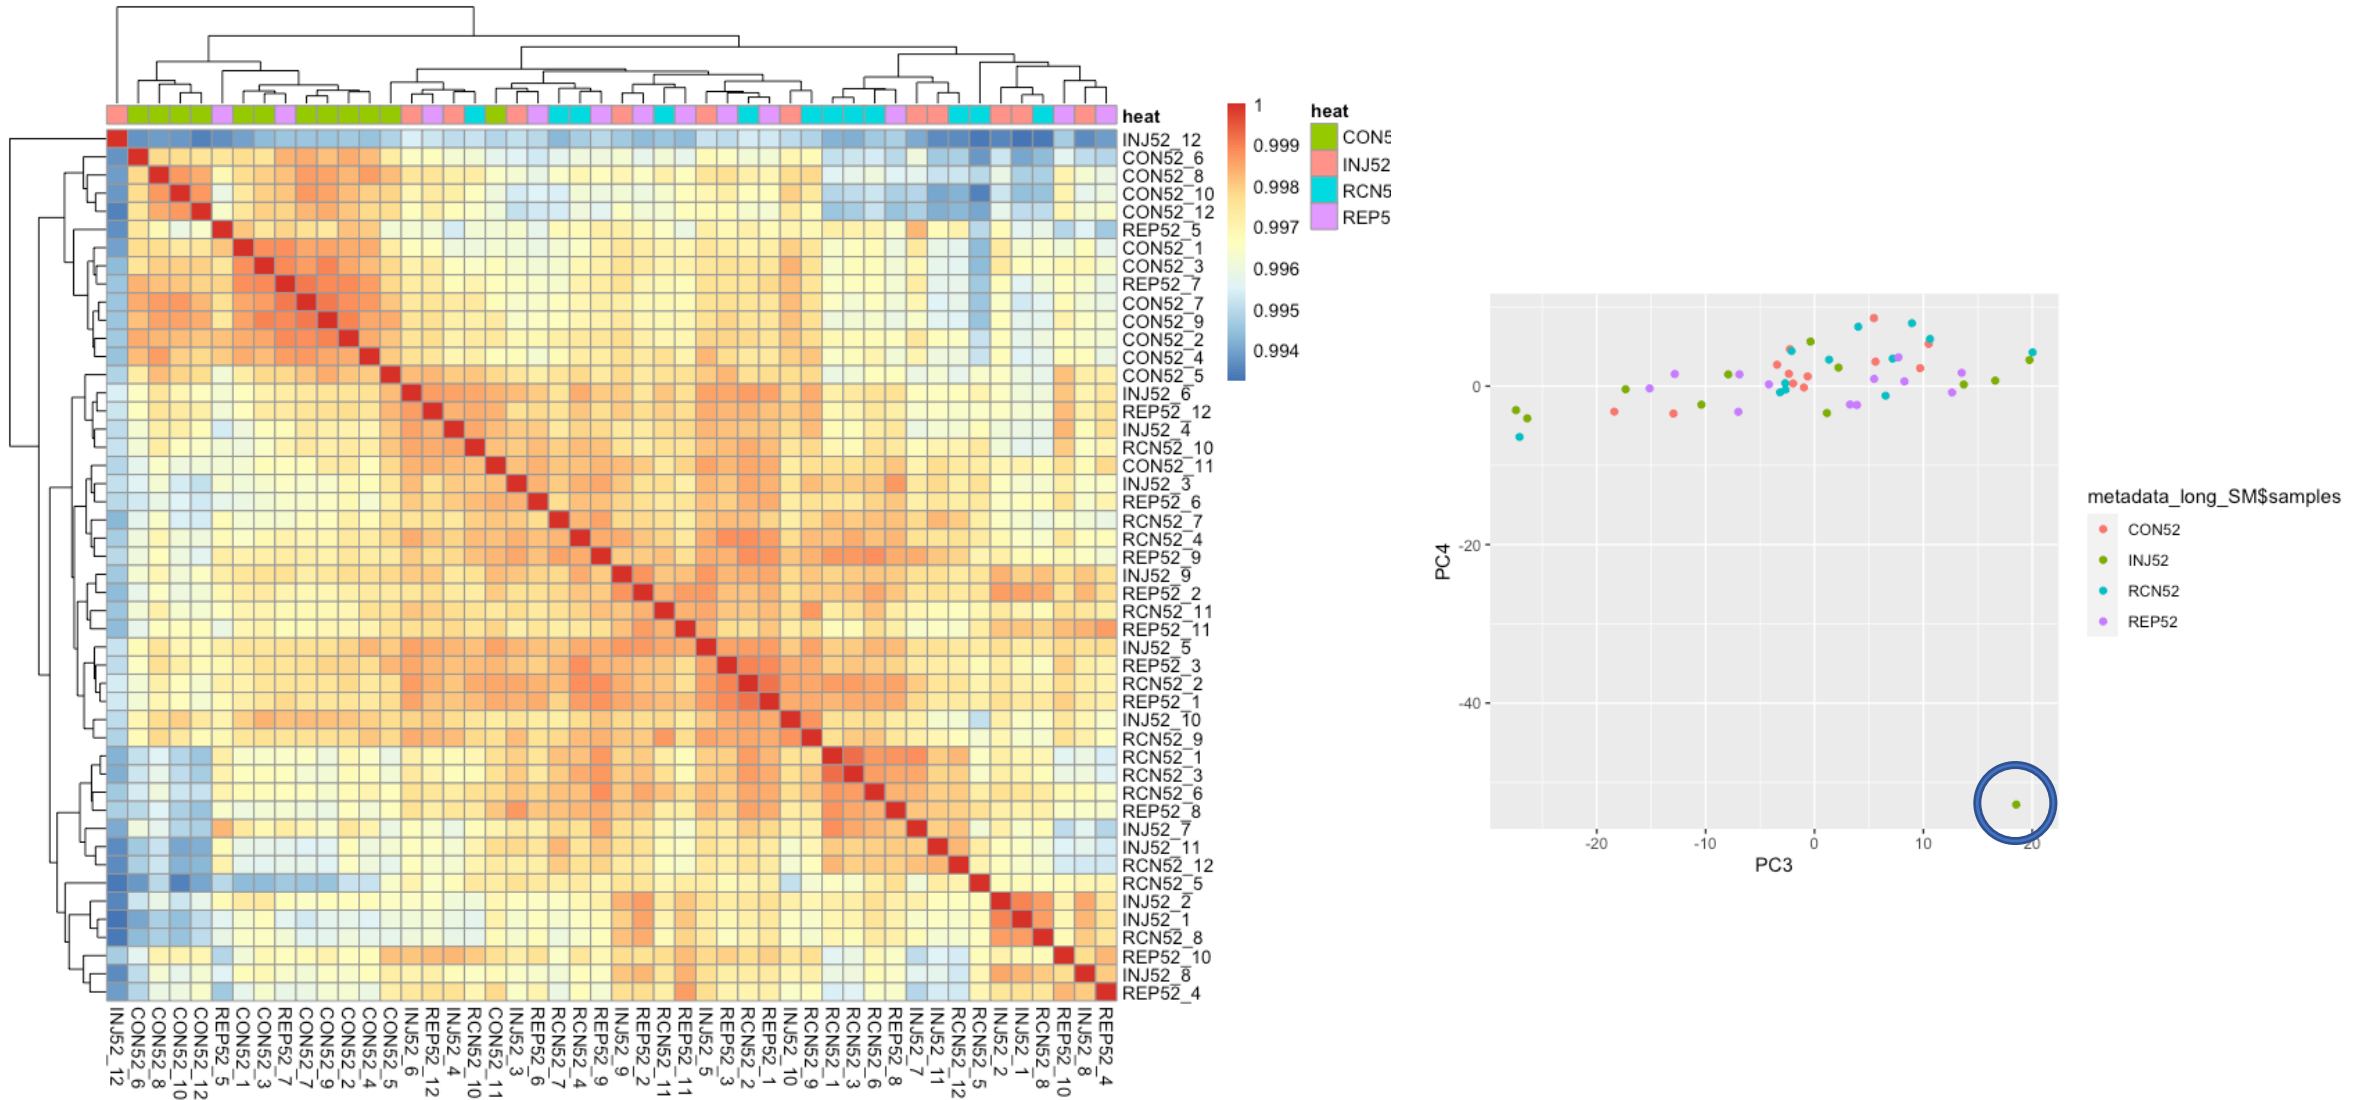

# After removing INJ52\_SM\_12

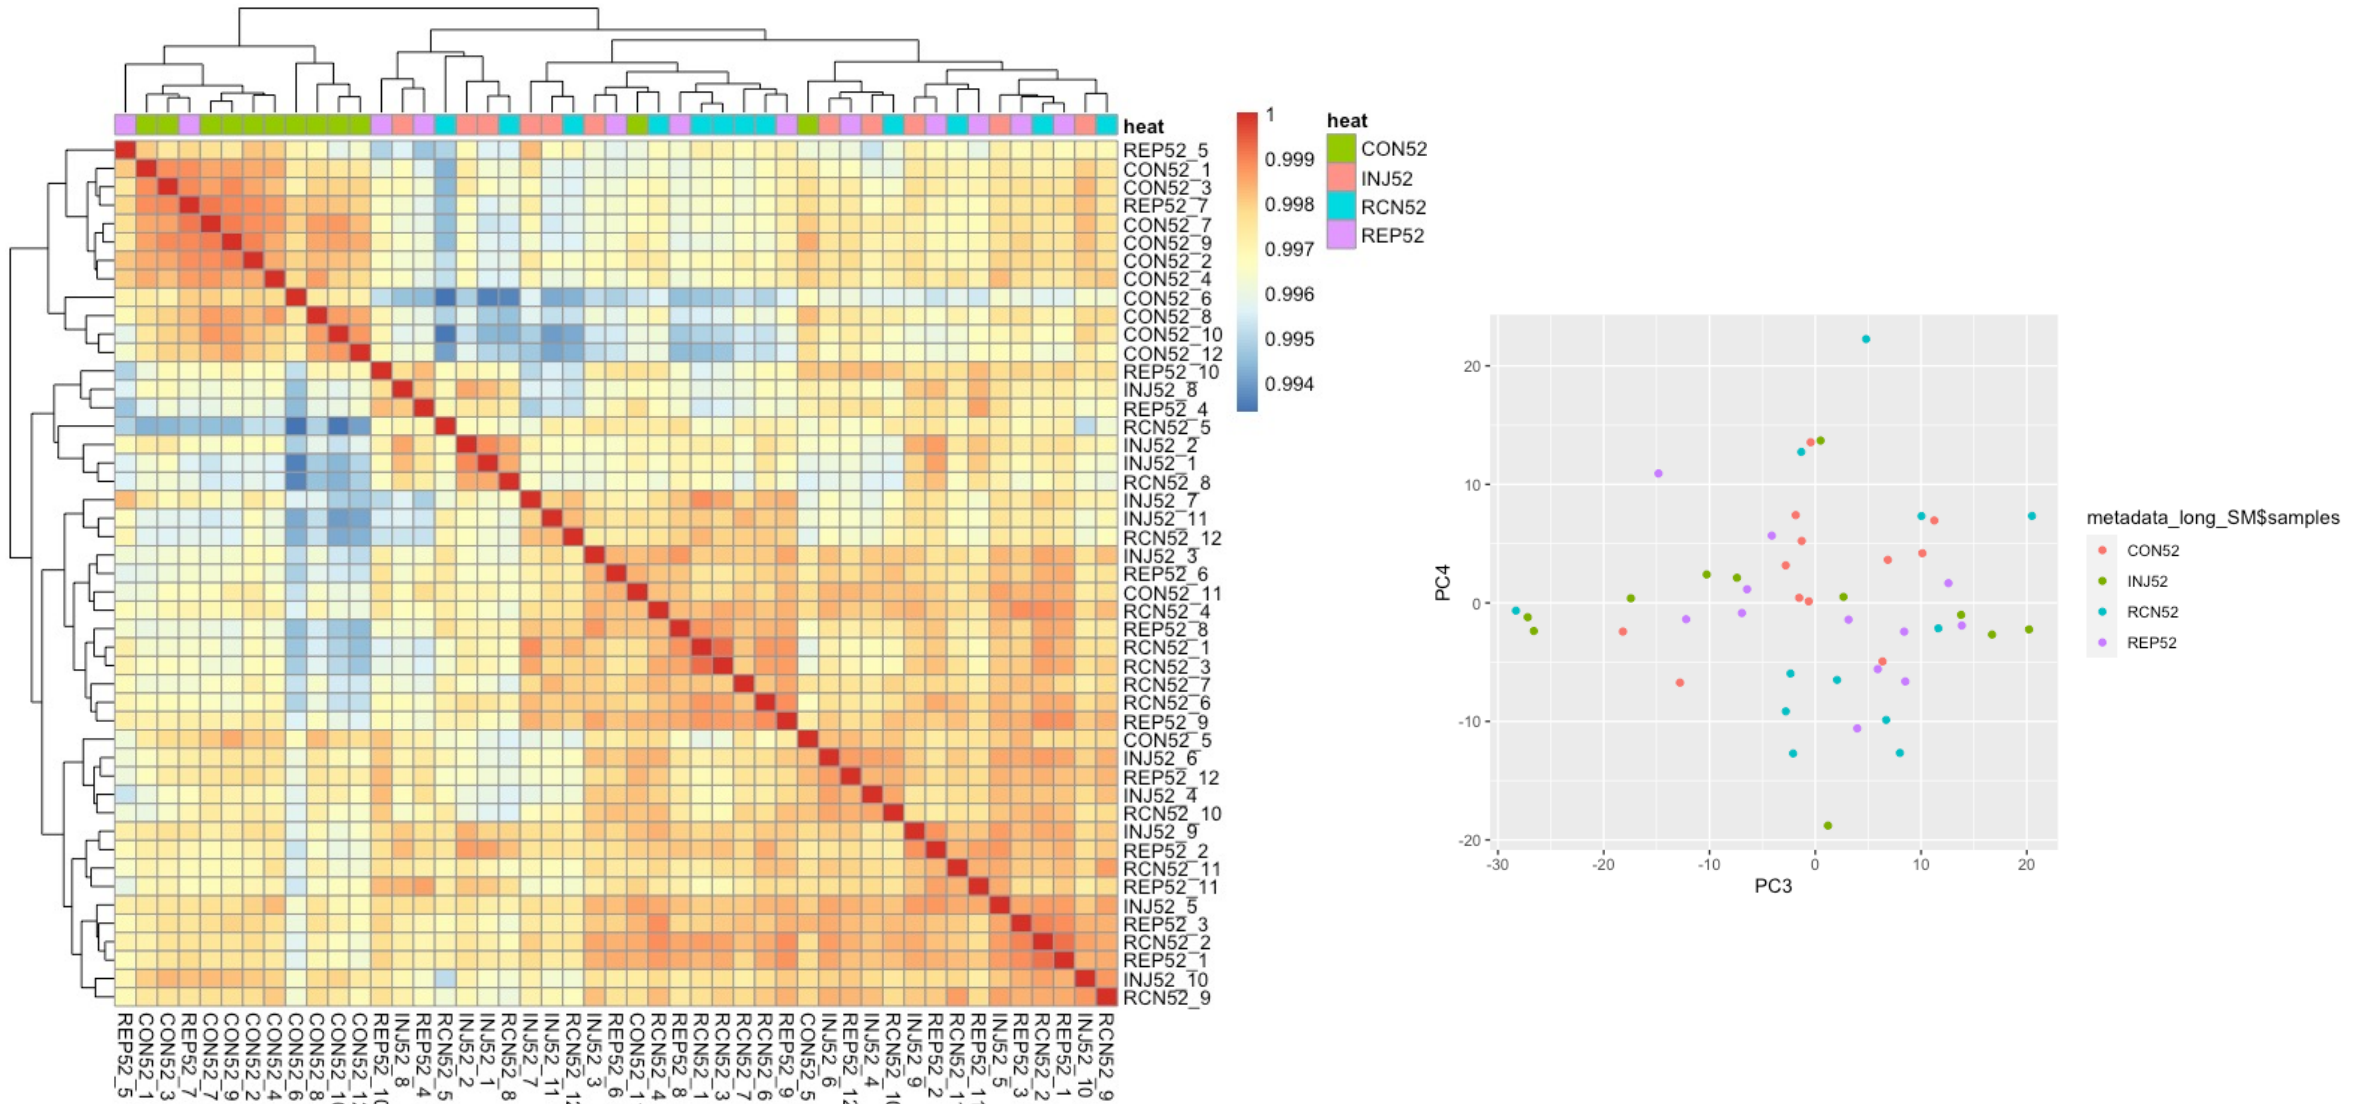

Supplement: s1 [file s1]
